# Supplementary material for: DNA polymerase IV mediates efficient and quick recovery of replication forks stalled at N2-dG adducts
Source: PubMed Central journal article supplement — Nucleic Acids Res. 2014 Jun 21;42(13):8461–72. doi: 10.1093/nar/gku547 (PMC4117773; doi:10.1093/nar/gku547), 2014-06-21
Supplement: supp_gku547_nar-00777-d-2014-File008.pdf [file supp_gku547_nar-00777-d-2014-File008.pdf]

## Supplemental Figure

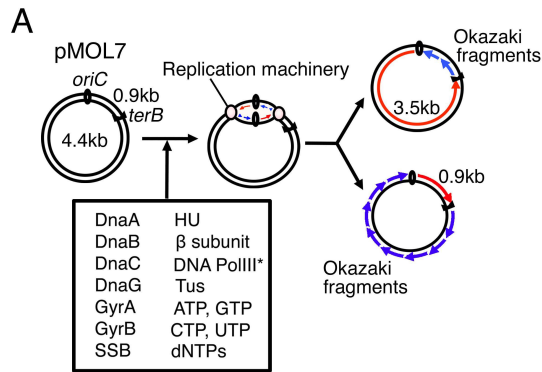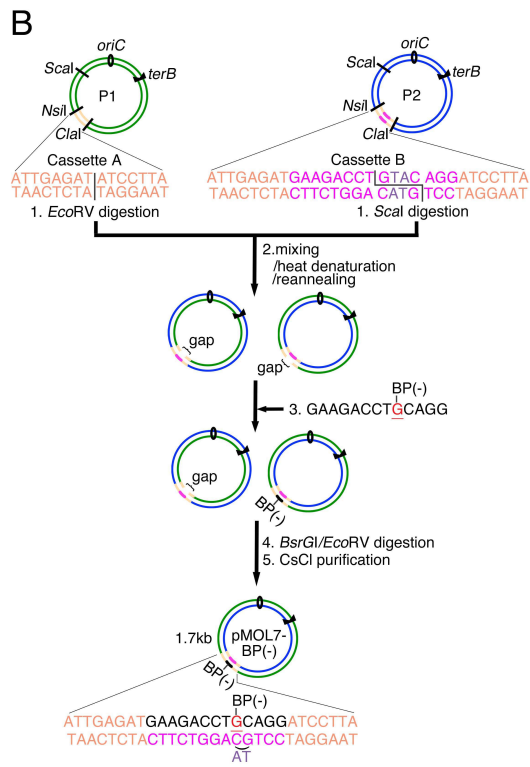

## Supplemental Figure Legend

**(A) Diagram showing the reconstitution of semi-bidirectional DNA replication of an *oriC-terB* plasmid.** Reconstituted replication forks proceed bidirectionally with concurrent strand synthesis. Black lines indicate template DNA strands. Red and blue lines with arrowheads indicate leading- and lagging-strand synthesis, respectively. Tus protein blocks the clockwise replication fork at the *terB* sequence. To reconstitute the replication fork, the *oriC-terB* plasmid pMOL7 was incubated with replicative proteins in the presence of dNTPs. The reaction mixtures (15  $\mu$ l) contained 40 mM Hepes-KOH (pH 7.6), 10 mM dithiothreitol, 0.1 mg/ml bovine serum albumin, 10 mM magnesium acetate, 4 mM creatine phosphate, 2 mM ATP, 1 mM each of GTP, CTP, and UTP, 0.1 mM each of dATP, dGTP, dCTP, and dTTP, 30 ng template DNA (0.67 nM), 40  $\mu$ g/ml creatine kinase, 50  $\mu$ M NAD, 174 ng single-strand DNA binding protein (SSB), 30 ng  $\beta$ -subunit, 5 ng HU, 108 ng DNA gyrase A subunit, 216 ng DNA gyrase B subunit, 90 ng DnaB, 194 ng DnaG, 55 ng DnaC, 67 ng Tus, 90 ng DnaA, and 14.4 units of Pol III\*. The reaction was initiated by the addition of DnaA and incubated at 30°C for the indicated time.

**(B) Strategy for the construction of template plasmids pMOL7-BP(-).** Plasmids containing a single dG-BP(-) lesion are prepared by the gapped-duplex strategy. 1. parental plasmids P1 and P2 were digested by *EcoRV* and *ScaI*, respectively. The sequences of these plasmids were identical to that of pMOL7 except that the fragments between *NsiI* and *ClaI* site were replaced by cassette A containing an *EcoRV* site (P1) or cassette B containing a *BsrGI* site (P2). 2. Equimolar quantities of the linearized plasmids were mixed, heat denatured, and re-annealed to produce two types of double-stranded intermediates with a 15-mer ssDNA gap. 3. The 13-mer oligonucleotides containing the dG-BP(-) lesion (5'-GAAGACCTG<sup>BP(-)</sup>CAGG-3') were ligated with one type of the gapped-duplex. The resulting covalently closed circular plasmid, called pMOL7-BP(-), contained a 2-nt mismatch across from the dG-BP(-) adduct. 4. The restriction enzyme treatments linearized contaminating parental plasmids, while pMOL7-BP(-) remained circular. 5. pMOL7-BP(-) was separated from other species by CsCl density gradient centrifugation in the presence of

ethyidium bromide. To introduce negative supercoils to plasmids, 1.2  $\mu\text{g}$  of plasmid DNA was treated with 4.8 units of gyrase AB (New England Biolabs) for 30 min at 37°C and then purified for *in vitro* replication assay. The control plasmid, called pMOL7-control, was prepared by the same procedure but using the 13-mer oligonucleotides without adducts.
